# Supplementary material for: Quality Awareness and Its Influence on the Evaluation of App Meta-Information by Physicians: Validation Study
Source: PubMed Central journal article supplement (PMC6887815; doi:10.2196/16442), 2019-11-18
Supplement: mhealth_v7i11e16442_app2.pdf [file mhealth_v7i11e16442_app2.pdf]

## Multimedia Appendix 2

Table B. Assessment as to whether information for the 9 quality principles could be found within the available app descriptions: assessments for group A (N=220) and for group B (N=221).

|                                                                                                                                                 | <b>Group A (N=220), n (%)</b> | <b>Group B (N=221), n (%)</b> | <b><math>\chi^2</math></b> | <b>df</b> | <b>P</b> |
|-------------------------------------------------------------------------------------------------------------------------------------------------|-------------------------------|-------------------------------|----------------------------|-----------|----------|
| Q201: Practicality: Can you use the app description to make an assessment as to whether the app is useful?                                      |                               |                               | 1.1                        | 2         | .59      |
| Yes                                                                                                                                             | 98 (44.5)                     | 109 (49.3)                    |                            |           |          |
| No                                                                                                                                              | 100 (45.5)                    | 93 (42.1)                     |                            |           |          |
| Do not know                                                                                                                                     | 22 (10.0)                     | 19 (8.6)                      |                            |           |          |
| Q202: Risk-adequacy: Can you use the app description to make an assessment as to whether the app is risk-adequate?                              |                               |                               | 2                          | 2         | .36      |
| Yes                                                                                                                                             | 29 (13.2)                     | 40 (18.1)                     |                            |           |          |
| No                                                                                                                                              | 162 (73.6)                    | 153 (69.2)                    |                            |           |          |
| Do not know                                                                                                                                     | 29 (13.2)                     | 28 (12.7)                     |                            |           |          |
| Q203: Ethical soundness: Can you use the app description to make an assessment as to whether the app is ethically safe?                         |                               |                               | 0.5                        | 2         | .07      |
| Yes                                                                                                                                             | 31 (14.1)                     | 30 (13.6)                     |                            |           |          |
| No                                                                                                                                              | 160 (72.7)                    | 176 (79.6)                    |                            |           |          |
| Do not know                                                                                                                                     | 29 (13.2)                     | 15 (6.8)                      |                            |           |          |
| Q204: Legal conformity: Can you use the app description to make an assessment as to whether the app is legally compliant?                       |                               |                               | 0.5                        | 2         | .76      |
| Yes                                                                                                                                             | 21 (9.5)                      | 17 (7.7)                      |                            |           |          |
| No                                                                                                                                              | 173 (78.6)                    | 179 (81.0)                    |                            |           |          |
| Do not know                                                                                                                                     | 26 (11.8)                     | 25 (11.3)                     |                            |           |          |
| Q205: Content validity: Can you use the app description to make an assessment as to whether the content of the app is valid?                    |                               |                               | 1.3                        | 2         | .51      |
| Yes                                                                                                                                             | 38 (17.3)                     | 37 (16.7)                     |                            |           |          |
| No                                                                                                                                              | 163 (74.1)                    | 171 (77.4)                    |                            |           |          |
| Do not know                                                                                                                                     | 19 (8.6)                      | 13 (5.9)                      |                            |           |          |
| Q206: Technical adequacy: Can you use the app description to make an assessment as to whether the app is technically appropriate?               |                               |                               | 3.8                        | 2         | .15      |
| Yes                                                                                                                                             | 25 (11.4)                     | 38 (17.2)                     |                            |           |          |
| No                                                                                                                                              | 167 (75.9)                    | 162 (73.3)                    |                            |           |          |
| Do not know                                                                                                                                     | 28 (12.7)                     | 21 (9.5)                      |                            |           |          |
| Q207: Usability: Can you use the app description to make an assessment as to whether the app is usable?                                         |                               |                               | 0.9                        | 2         | .64      |
| Yes                                                                                                                                             | 40 (18.2)                     | 48 (21.7)                     |                            |           |          |
| No                                                                                                                                              | 156 (70.9)                    | 149 (67.4)                    |                            |           |          |
| Do not know                                                                                                                                     | 24 (10.9)                     | 24 (10.9)                     |                            |           |          |
| Q208: Resource efficiency: Can you use the app description to make an assessment as to whether the app is resource-efficient?                   |                               |                               | 0.8                        | 2         | .66      |
| Yes                                                                                                                                             | 16 (7.3)                      | 12 (5.4)                      |                            |           |          |
| No                                                                                                                                              | 188 (85.5)                    | 190 (86.0)                    |                            |           |          |
| Do not know                                                                                                                                     | 16 (7.3)                      | 19 (8.6)                      |                            |           |          |
| Q209: Transparency: Can you use the app description to make an assessment as to whether the app description is transparent on the above points? |                               |                               | 0.2                        | 2         | .90      |
| Yes                                                                                                                                             | 20 (9.1)                      | 19 (8.6)                      |                            |           |          |
| No                                                                                                                                              | 178 (80.9)                    | 177 (80.1)                    |                            |           |          |
| Do not know                                                                                                                                     | 22 (10.0)                     | 25 (11.3)                     |                            |           |          |
