# Supplementary material for: Quality Awareness and Its Influence on the Evaluation of App Meta-Information by Physicians: Validation Study
Source: PubMed Central journal article supplement (PMC6887815; doi:10.2196/16442), 2019-11-18
Supplement: mhealth_v7i11e16442_app3.pdf [file mhealth_v7i11e16442_app3.pdf]

## Multimedia Appendix 3

Table C. Assessment of whether there was sufficient information to answer 25 detailed questions on the basis of the available app descriptions: assessments for group A (N=220) and group B (N=221).

|                                                                                                                                                                                                                                                               |              | Group A (N=220), n (%) | Group B (N=221), n (%) | $\chi^2$ | df | P   |
|---------------------------------------------------------------------------------------------------------------------------------------------------------------------------------------------------------------------------------------------------------------|--------------|------------------------|------------------------|----------|----|-----|
| Q301: Has the purpose of the app been specified?                                                                                                                                                                                                              |              |                        |                        | 2.8      | 2  | .25 |
|                                                                                                                                                                                                                                                               | Yes          | 191 (86.8)             | 190 (86.0)             |          |    |     |
|                                                                                                                                                                                                                                                               | No           | 19 (8.6)               | 26 (11.8)              |          |    |     |
|                                                                                                                                                                                                                                                               | Do not know  | 10 (4.5)               | 5 (2.3)                |          |    |     |
| Q302: Is there a description of which functions the app includes to fulfill its purpose?                                                                                                                                                                      |              |                        |                        | 3.6      | 2  | .17 |
|                                                                                                                                                                                                                                                               | Yes          | 125 (56.8)             | 136 (61.5)             |          |    |     |
|                                                                                                                                                                                                                                                               | No           | 86 (39.1)              | 70 (31.7)              |          |    |     |
|                                                                                                                                                                                                                                                               | Do not know  | 9 (4.1)                | 15 (6.8)               |          |    |     |
| Q303: Is there a description of the methods employed by the app to fulfill its purpose given (e.g. procedures, processes, algorithms with which the offered functions are implemented) and are there statements regarding their suitability for this purpose? |              |                        |                        | 1.9      | 2  | .38 |
|                                                                                                                                                                                                                                                               | Yes          | 30 (13.6)              | 25 (11.3)              |          |    |     |
|                                                                                                                                                                                                                                                               | No           | 177 (80.5)             | 176 (79.6)             |          |    |     |
|                                                                                                                                                                                                                                                               | Do not know  | 13 (5.9)               | 20 (9.0)               |          |    |     |
| Q304: Is appropriate evidence cited to support the statements on fulfillment of the purpose of the app (e.g. references to studies, guidelines, testing, and quality labels)?                                                                                 |              |                        |                        | 1.0      | 2  | .62 |
|                                                                                                                                                                                                                                                               | Yes          | 22 (10.0)              | 25 (11.3)              |          |    |     |
|                                                                                                                                                                                                                                                               | No           | 188 (85.5)             | 182 (82.4)             |          |    |     |
|                                                                                                                                                                                                                                                               | Do not know  | 10 (4.5)               | 14 (6.3)               |          |    |     |
| Q305: Are the suitability and unsuitability for certain application scenarios or user groups specified (e.g. in terms of inclusion and exclusion criteria)?                                                                                                   |              |                        |                        | 0.5      | 2  | .78 |
|                                                                                                                                                                                                                                                               | Yes          | 25 (11.4)              | 30 (13.6)              |          |    |     |
|                                                                                                                                                                                                                                                               | No           | 179 (81.4)             | 175 (79.2)             |          |    |     |
|                                                                                                                                                                                                                                                               | Do not know  | 16 (7.3)               | 16 (7.2)               |          |    |     |
| Q306: Have potential or actual risks the app poses to users or their environment (with respect to health, economic, or social aspects) been stated?                                                                                                           |              |                        |                        | 1.5      | 3  | .68 |
|                                                                                                                                                                                                                                                               | Yes          | 14 (6.4)               | 11 (5.0)               |          |    |     |
|                                                                                                                                                                                                                                                               | Not answered | 1 (0.5)                | 0 (0.0)                |          |    |     |
|                                                                                                                                                                                                                                                               | No           | 193 (87.7)             | 199 (90.0)             |          |    |     |
|                                                                                                                                                                                                                                                               | Do not know  | 12 (5.5)               | 11 (5.0)               |          |    |     |
| Q307: Have precautions been taken to avoid health, economic and/or social risks when using the described app?                                                                                                                                                 |              |                        |                        | 2        | 2  | .37 |
|                                                                                                                                                                                                                                                               | Yes          | 21 (9.5)               | 14 (6.3)               |          |    |     |
|                                                                                                                                                                                                                                                               | No           | 186 (84.5)             | 190 (86.0)             |          |    |     |
|                                                                                                                                                                                                                                                               | Do not know  | 13 (5.9)               | 17 (7.7)               |          |    |     |
| Q308: Is there a description about the extent to which the app follows ethical principles such as patient autonomy, equity of access and/or professional ethics and research ethics?                                                                          |              |                        |                        | 1.5      | 2  | .47 |
|                                                                                                                                                                                                                                                               | Yes          | 9 (4.1)                | 10 (4.5)               |          |    |     |
|                                                                                                                                                                                                                                                               | No           | 195 (88.6)             | 201 (91.0)             |          |    |     |
|                                                                                                                                                                                                                                                               | Do not know  | 16 (7.3)               | 10 (4.5)               |          |    |     |
| Q309: Are conflicts of interest (e.g. authors with affiliation to specific companies) discussed in the app description text?                                                                                                                                  |              |                        |                        | 0.6      | 2  | .74 |
|                                                                                                                                                                                                                                                               | Yes          | 12 (5.5)               | 10 (4.5)               |          |    |     |
|                                                                                                                                                                                                                                                               | No           | 199 (90.5)             | 199 (90.0)             |          |    |     |
|                                                                                                                                                                                                                                                               | Do not know  | 9 (4.1)                | 12 (5.4)               |          |    |     |
| Q310: Is there a mention of whether the app is being provided in a research context and if so, is there a statement about whether it follows good scientific practice?                                                                                        |              |                        |                        | 0.8      | 2  | .68 |
|                                                                                                                                                                                                                                                               | Yes          | 18 (8.2)               | 22 (10.0)              |          |    |     |
|                                                                                                                                                                                                                                                               | No           | 187 (85.0)             | 181 (81.9)             |          |    |     |
|                                                                                                                                                                                                                                                               | Do not know  | 15 (6.8)               | 18 (8.1)               |          |    |     |

|  |                                                                                                                                                                                                                                          | <b>Group A (N=220), n (%)</b> | <b>Group B (N=221), n (%)</b> | <b><math>\chi^2</math></b> | <b>df</b> | <b>P</b> |
|--|------------------------------------------------------------------------------------------------------------------------------------------------------------------------------------------------------------------------------------------|-------------------------------|-------------------------------|----------------------------|-----------|----------|
|  | Q311: Is there a statement about whether the relevant general legal requirements, such as data protection law, telemedia law, commercial law, have been taken into account by the manufacturer/provider of the app?                      |                               |                               | 0.6                        | 2         | .73      |
|  | Yes                                                                                                                                                                                                                                      | 12 (5.5)                      | 16 (7.2)                      |                            |           |          |
|  | No                                                                                                                                                                                                                                       | 191 (86.8)                    | 187 (84.6)                    |                            |           |          |
|  | Do not know                                                                                                                                                                                                                              | 17 (7.7)                      | 18 (8.1)                      |                            |           |          |
|  | Q312: Is there a statement about which requirements/regulations have been taken into account with regard to using the app in a health context, such as medical device law or medical professional law?                                   |                               |                               | 0.5                        | 2         | .76      |
|  | Yes                                                                                                                                                                                                                                      | 16 (7.3)                      | 13 (5.9)                      |                            |           |          |
|  | No                                                                                                                                                                                                                                       | 189 (85.9)                    | 195 (88.2)                    |                            |           |          |
|  | Do not know                                                                                                                                                                                                                              | 15 (6.8)                      | 13 (5.9)                      |                            |           |          |
|  | Q313: Is there a statement about how the quality of the content has been ensured (e.g. involvement of experts in the field) or which (validated) sources have been used (e.g. consideration of current scientific findings, guidelines)? |                               |                               | 1.1                        | 3         | .79      |
|  | Yes                                                                                                                                                                                                                                      | 32 (14.5)                     | 34 (15.4)                     |                            |           |          |
|  | No                                                                                                                                                                                                                                       | 171 (77.7)                    | 171 (77.4)                    |                            |           |          |
|  | Do not know                                                                                                                                                                                                                              | 16 (7.3)                      | 16 (7.2)                      |                            |           |          |
|  | Not answered                                                                                                                                                                                                                             | 1 (0.5)                       | 0 (0.0)                       |                            |           |          |
|  | Q314: Is there a description of how the app is regularly adapted to new content requirements?                                                                                                                                            |                               |                               | 2.2                        | 3         | .53      |
|  | Yes                                                                                                                                                                                                                                      | 21 (9.5)                      | 19 (8.6)                      |                            |           |          |
|  | No                                                                                                                                                                                                                                       | 182 (82.7)                    | 188 (85.1)                    |                            |           |          |
|  | Do not know                                                                                                                                                                                                                              | 15 (6.8)                      | 14 (6.3)                      |                            |           |          |
|  | Not answered                                                                                                                                                                                                                             | 2 (0.9)                       | 0 (0.0)                       |                            |           |          |
|  | Q315: Is it described to what extent the app corresponds to the current state of the art?                                                                                                                                                |                               |                               | 1.4                        | 3         | .71      |
|  | Yes                                                                                                                                                                                                                                      | 17 (7.7)                      | 14 (6.3)                      |                            |           |          |
|  | No                                                                                                                                                                                                                                       | 185 (84.1)                    | 188 (85.1)                    |                            |           |          |
|  | Do not know                                                                                                                                                                                                                              | 17 (7.7)                      | 19 (8.6)                      |                            |           |          |
|  | Not answered                                                                                                                                                                                                                             | 1 (0.5)                       | 0 (0.0)                       |                            |           |          |
|  | Q316: Is there information about how the app is regularly adapted to technical requirements?                                                                                                                                             |                               |                               | 1.1                        | 3         | .77      |
|  | Yes                                                                                                                                                                                                                                      | 14 (6.4)                      | 14 (6.3)                      |                            |           |          |
|  | No                                                                                                                                                                                                                                       | 192 (87.3)                    | 192 (86.9)                    |                            |           |          |
|  | Do not know                                                                                                                                                                                                                              | 13 (5.9)                      | 15 (6.8)                      |                            |           |          |
|  | Not answered                                                                                                                                                                                                                             | 1 (0.5)                       | 0 (0.0)                       |                            |           |          |
|  | Q317: Is there information about to what extent it is possible to switch to another operating system or device without data loss?                                                                                                        |                               |                               | 1.4                        | 3         | .71      |
|  | Yes                                                                                                                                                                                                                                      | 6 (2.7)                       | 7 (3.2)                       |                            |           |          |
|  | No                                                                                                                                                                                                                                       | 201 (91.4)                    | 195 (88.2)                    |                            |           |          |
|  | Do not know                                                                                                                                                                                                                              | 12 (5.5)                      | 18 (8.1)                      |                            |           |          |
|  | Not answered                                                                                                                                                                                                                             | 1 (0.5)                       | 1 (0.5)                       |                            |           |          |
|  | Q318: Is there a mention of whether the app is scalable (adaptable to increasing requirements) or can be integrated into other products?                                                                                                 |                               |                               | 0.8                        | 3         | .85      |
|  | Yes                                                                                                                                                                                                                                      | 12 (5.5)                      | 14 (6.3)                      |                            |           |          |
|  | No                                                                                                                                                                                                                                       | 195 (88.6)                    | 190 (86.0)                    |                            |           |          |
|  | Do not know                                                                                                                                                                                                                              | 12 (5.5)                      | 16 (7.2)                      |                            |           |          |
|  | Not answered                                                                                                                                                                                                                             | 1 (0.5)                       | 1 (0.5)                       |                            |           |          |
|  | Q319: Has information been provided about proofs for the app's usability (e.g. usability tests)?                                                                                                                                         |                               |                               | 1.9                        | 3         | .59      |
|  | Yes                                                                                                                                                                                                                                      | 13 (5.9)                      | 7 (3.2)                       |                            |           |          |
|  | No                                                                                                                                                                                                                                       | 190 (86.4)                    | 196 (88.7)                    |                            |           |          |
|  | Do not know                                                                                                                                                                                                                              | 16 (7.3)                      | 17 (7.7)                      |                            |           |          |
|  | Not answered                                                                                                                                                                                                                             | 1 (0.5)                       | 1 (0.5)                       |                            |           |          |

|  |                                                                                                                                                                                                         | <b>Group A (N=220), n (%)</b> | <b>Group B (N=221), n (%)</b> | <b><math>\chi^2</math></b> | <b>df</b> | <b>P</b> |
|--|---------------------------------------------------------------------------------------------------------------------------------------------------------------------------------------------------------|-------------------------------|-------------------------------|----------------------------|-----------|----------|
|  | Q320: Is it described to what extent the function of the app has been specifically adapted to the target group, is barrier-free or can be used with individual adaptations?                             |                               |                               | 4.4                        | 3         | .22      |
|  | Yes                                                                                                                                                                                                     | 18 (8.2)                      | 20 (9.0)                      |                            |           |          |
|  | No                                                                                                                                                                                                      | 178 (80.9)                    | 189 (85.5)                    |                            |           |          |
|  | Do not know                                                                                                                                                                                             | 22 (10.0)                     | 11 (5.0)                      |                            |           |          |
|  | Not answered                                                                                                                                                                                            | 2 (0.9)                       | 1 (0.5)                       |                            |           |          |
|  | Q321: Is there information about the extent to which user feedback was considered for the app (e.g. during the development process)?                                                                    |                               |                               | 2.1                        | 3         | .55      |
|  | Yes                                                                                                                                                                                                     | 16 (7.3)                      | 11 (5.0)                      |                            |           |          |
|  | No                                                                                                                                                                                                      | 185 (84.1)                    | 196 (88.7)                    |                            |           |          |
|  | Do not know                                                                                                                                                                                             | 17 (7.7)                      | 13 (5.9)                      |                            |           |          |
|  | Not answered                                                                                                                                                                                            | 2 (0.9)                       | 1 (0.5)                       |                            |           |          |
|  | Q322: Is there a statement about how the app ensures efficient use of the available technical resources (e.g. required memory, computing power, internal or external sensors, power consumption, etc.)? |                               |                               | 2.8                        | 3         | .43      |
|  | Yes                                                                                                                                                                                                     | 7 (3.2)                       | 7 (3.2)                       |                            |           |          |
|  | No                                                                                                                                                                                                      | 204 (92.7)                    | 197 (89.1)                    |                            |           |          |
|  | Do not know                                                                                                                                                                                             | 8 (3.6)                       | 16 (7.2)                      |                            |           |          |
|  | Not answered                                                                                                                                                                                            | 1 (0.5)                       | 1 (0.5)                       |                            |           |          |
|  | Q323: Is the information about the app sufficient, i.e. adequately specified in scope and depth of information?                                                                                         |                               |                               | 0.9                        | 3         | .82      |
|  | Yes                                                                                                                                                                                                     | 33 (15.0)                     | 37 (16.7)                     |                            |           |          |
|  | No                                                                                                                                                                                                      | 168 (76.4)                    | 161 (72.9)                    |                            |           |          |
|  | Do not know                                                                                                                                                                                             | 18 (8.2)                      | 21 (9.5)                      |                            |           |          |
|  | Not answered                                                                                                                                                                                            | 1 (0.5)                       | 2 (0.9)                       |                            |           |          |
|  | Q324: Is valid information (i.e. complete and reliable) given about the app?                                                                                                                            |                               |                               | 4.5                        | 3         | .21      |
|  | Yes                                                                                                                                                                                                     | 22 (10.0)                     | 35 (15.8)                     |                            |           |          |
|  | No                                                                                                                                                                                                      | 168 (76.4)                    | 150 (67.9)                    |                            |           |          |
|  | Do not know                                                                                                                                                                                             | 29 (13.2)                     | 35 (15.8)                     |                            |           |          |
|  | Not answered                                                                                                                                                                                            | 1 (0.5)                       | 1 (0.5)                       |                            |           |          |
|  | Q325: Is the information about the app described in a manner that is adequate for the target group?                                                                                                     |                               |                               | 0.7                        | 3         | .87      |
|  | Yes                                                                                                                                                                                                     | 75 (34.1)                     | 75 (33.9)                     |                            |           |          |
|  | No                                                                                                                                                                                                      | 118 (53.6)                    | 113 (51.1)                    |                            |           |          |
|  | Do not know                                                                                                                                                                                             | 26 (11.8)                     | 32 (14.5)                     |                            |           |          |
|  | Not answered                                                                                                                                                                                            | 1 (0.5)                       | 1 (0.5)                       |                            |           |          |
