# Supplementary material for: Quality Awareness and Its Influence on the Evaluation of App Meta-Information by Physicians: Validation Study
Source: PubMed Central journal article supplement (PMC6887815; doi:10.2196/16442), 2019-11-18
Supplement: mhealth_v7i11e16442_app4.pdf [file mhealth_v7i11e16442_app4.pdf]

## Multimedia Appendix 4

### Regression Analysis

#### Group A (N=220)

Table D-1: Results of the regression analysis for group A for changes from A1 to a more critical assessment in A2 versus sufficiency of the information provided for assessing the 9 quality principles. Reference category was "no". NR<sup>2</sup> = Nagelkerke's R squared.

| Criterion                        | Direction   | P     | OR    | CI95 low | CI95 high | NR <sup>2</sup> |
|----------------------------------|-------------|-------|-------|----------|-----------|-----------------|
| <b>Q201: Practicality</b>        |             |       |       |          |           |                 |
|                                  | No          |       |       |          |           |                 |
|                                  | Do not know | 0.189 | 1.989 | 0.712    | .555      | .056            |
|                                  | Yes         | .004  | 2.586 | 1.356    | 4.930     | .056            |
|                                  | Constant    | <.001 | .235  |          |           |                 |
| <b>Q202: Risk adequacy</b>       |             |       |       |          |           |                 |
|                                  | No          |       |       |          |           |                 |
|                                  | Do not know | <.001 | 4.321 | 1.902    | 9.818     | .085            |
|                                  | Yes         | .643  | .796  | 0.303    | 2.092     | .085            |
| <b>Q203: Ethical soundness</b>   |             |       |       |          |           |                 |
|                                  | No          |       |       |          |           |                 |
|                                  | Do not know | .004  | 3.324 | 1.475    | 7.494     | .053            |
|                                  | Yes         | .585  | 1.269 | .540     | 2.986     | .053            |
|                                  | Constant    | <.001 | .322  |          |           |                 |
| <b>Q204: Legal conformity</b>    |             |       |       |          |           |                 |
|                                  | No          |       |       |          |           |                 |
|                                  | Do not know | .835  | .906  | .359     | 2.290     | <.001           |
|                                  | Yes         | .975  | .984  | .361     | 2.681     | <.001           |
|                                  | Constant    | .000  | .407  |          |           |                 |
| <b>Q205: Content validity</b>    |             |       |       |          |           |                 |
|                                  | No          |       |       |          |           |                 |
|                                  | Do not know | .092  | 2.289 | .874     | 5.996     | .027            |
|                                  | Yes         | .371  | .678  | .290     | 1.589     | .027            |
|                                  | Constant    | <.001 | .393  |          |           |                 |
| <b>Q206: Technical adequacy</b>  |             |       |       |          |           |                 |
|                                  | No          |       |       |          |           |                 |
|                                  | Do not know | .764  | 1.141 | .483     | 2.696     |                 |
|                                  | Yes         | .337  | .602  | .214     | 1.695     | .008            |
|                                  | Constant    | <.001 | .415  |          |           | .008            |
| <b>Q207: Usability</b>           |             |       |       |          |           |                 |
|                                  | No          |       |       |          |           |                 |
|                                  | Do not know | .093  | 2.143 | .881     | 5.212     | .024            |
|                                  | Yes         | .206  | 1.615 | .768     | 3.399     | .024            |
|                                  | Constant    | <.001 | .333  |          |           |                 |
| <b>Q208: Resource efficiency</b> |             |       |       |          |           |                 |
|                                  | No          |       |       |          |           |                 |
|                                  | Do not know | .795  | 1.158 | .384     | 3.492     | .001            |
|                                  | Yes         | .795  | 1.158 | .384     | 3.492     | .001            |
|                                  | Constant    | <.001 | .393  |          |           |                 |
| <b>Q209: Transparency</b>        |             |       |       |          |           |                 |
|                                  | No          |       |       |          |           |                 |
|                                  | Do not know | .218  | 1.772 | .713     | 4.406     | .015            |
|                                  | Yes         | .444  | .640  | .204     | 2.008     | 0.15            |
|                                  | Constant    | <.001 | .391  |          |           |                 |

Group B (N=221)

Table D-2: Results of the regression analysis for group B for changes from A1 to a more critical assessment in A2 versus sufficiency of the information provided for assessing the 9 quality principles. Reference category was “no”. NR<sup>2</sup> = Nagelkerke’s R squared.

| Criterion                             | Direction   | P     | OR    | CI95 low | CI95 high | NR <sup>2</sup> |
|---------------------------------------|-------------|-------|-------|----------|-----------|-----------------|
| <b>Q201: Practicality</b>             |             |       |       |          |           |                 |
|                                       | No          |       |       |          |           |                 |
|                                       | Do not know | .884  | 1.087 | .353     | 3.347     | .007            |
|                                       | Yes         | .310  | 1.380 | .741     | 2.568     | .007            |
|                                       | Constant    | <.001 |       |          |           |                 |
| <b>Q202: Risk adequacy</b>            |             |       |       |          |           |                 |
|                                       | No          |       |       |          |           |                 |
|                                       | Do not know | .506  | 1.333 | .571     | 3.112     | .022            |
|                                       | Yes         | .136  | .509  | .210     | 1.236     | .022            |
|                                       | Constant    |       |       |          |           |                 |
| <b>Q203: Ethical soundness</b>        |             |       |       |          |           |                 |
|                                       | No          |       |       |          |           |                 |
|                                       | Do not know | .746  | .822  | .250     | 2.696     | .028            |
|                                       | Yes         | .060  | .348  | .116     | 1.045     | .028            |
|                                       | Constant    | <.001 | .3222 |          |           |                 |
| <b>Q204: Legal conformity</b>         |             |       |       |          |           |                 |
|                                       | No          |       |       |          |           |                 |
|                                       | Do not know | .254  | .549  | .196     | 1.538     | .046            |
|                                       | Yes         | .057  | .137  | .018     | 1.061     | .046            |
|                                       | Constant    | <.001 | .455  |          |           |                 |
| <b>Q205: Content validity</b>         |             |       |       |          |           |                 |
|                                       | No          |       |       |          |           |                 |
|                                       | Do not know | .578  | 1.392 | .435     | 4.454     | .051            |
|                                       | Yes         | .018  | .270  | .091     | .801      | .051            |
|                                       | Constant    | <.001 | .449  |          |           |                 |
| <b>Q206: Technical adequacy</b>       |             |       |       |          |           |                 |
|                                       | No          |       |       |          |           |                 |
|                                       | Do not know | .249  | .512  | 1.64     | 1.599     | .024            |
|                                       | Yes         | .116  | .491  | .203     | 1.190     | .024            |
|                                       | Constant    | <.001 | .459  |          |           |                 |
| <b>Q207: Usability</b>                |             |       |       |          |           |                 |
|                                       | No          |       |       |          |           |                 |
|                                       | Do not know | .454  | .670  | .235     | 1.912     | .006            |
|                                       | Yes         | .684  | 1.158 | .571     | 2.348     | .006            |
|                                       | Constant    | <.001 | .393  |          |           |                 |
| <b>Q208: Resource efficiency</b>      |             |       |       |          |           |                 |
|                                       | No          |       |       |          |           |                 |
|                                       | Do not know | .042  | .120  | .016     | .923      | .067            |
|                                       | Yes         | .124  | .197  | .025     | 1.561     | .067            |
|                                       | Constant    | <.001 | .462  |          |           |                 |
| <b>Q209: Transparency<sup>a</sup></b> |             |       |       |          |           |                 |
|                                       | No          |       |       |          |           |                 |
|                                       | Do not know | .264  | .562  | .205     | 1.544     | .075            |
|                                       | Yes         | .048  | .054  | .003     | .974      |                 |
|                                       | Constant    | <.001 | .475  |          |           |                 |

<sup>a</sup> Firth's correction was applied due to a zero cell.
